# Supplementary material for: Polydopamine-derived porous carbon fiber/cobalt composites for efficient oxygen reduction reactions
Source: Royal Society of Chemistry journal article supplement (doi:10.1039/c5ta06217a), 2015-01-01
Supplement: c5ta06217a1.pdf [file c5ta06217a1.pdf]

## Supporting Information for

### **Polydopamine-Derived Porous Carbon Fiber/Cobalt Composites for Efficient Oxygen Reduction Reaction**

**Jiajie Yan,<sup>a</sup> Hengyi Lu,<sup>a</sup> Yunpeng Huang,<sup>a</sup> Jun Fu,<sup>c</sup> Shuyi Mo,<sup>c</sup> Chun Wei,<sup>c</sup> Yue-E Miao,<sup>b\*</sup>  
and Tianxi Liu<sup>a, b\*</sup>**

<sup>a</sup> *State Key Laboratory of Molecular Engineering of Polymers, Department of Macromolecular Science, Fudan University, Shanghai 200433, China. \*Corresponding author. E-mail: [txliu@fudan.edu.cn](mailto:txliu@fudan.edu.cn) (T. X. Liu), Tel: +86-21-55664197; Fax: +86-21-65640293.*

<sup>b</sup> *State Key Laboratory for Modification of Chemical Fibers and Polymer Materials, College of Materials Science and Engineering, Donghua University, Shanghai 201620, China.*

*\*Corresponding author. E-mail: [12110440023@fudan.edu.cn](mailto:12110440023@fudan.edu.cn) (Y. E. Miao).*

<sup>c</sup> *Key Laboratory of New Processing Technology for Nonferrous Metals and Materials, Ministry of Education, College of Materials Science and Engineering, Guilin University of Technology, Guilin, 541004, China.*

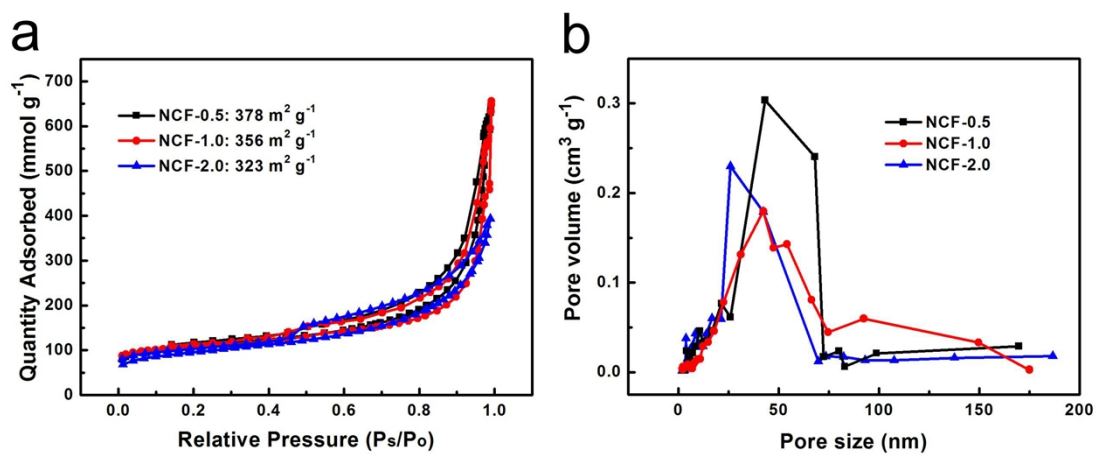

**Fig. S1** Nitrogen adsorption–desorption isotherms of NCF fibers (a) and the corresponding pore size distribution plots (b).

**Table S1.** Element contents of NCF fibers calculated from XPS characterizations.

| Sample  | N (%) | O (%) | C (%) |
|---------|-------|-------|-------|
| NCF-0.5 | 2.71  | 11.59 | 85.70 |
| NCF-1.0 | 3.41  | 10.13 | 86.46 |
| NCF-2.0 | 3.54  | 8.92  | 87.54 |

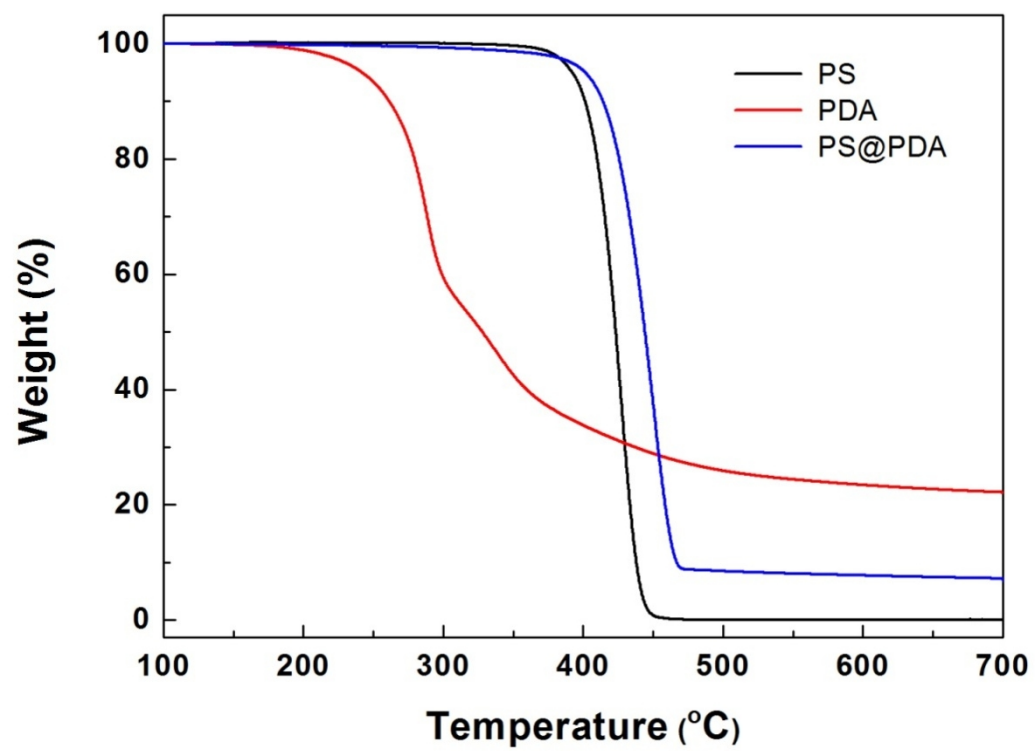

**Fig. S2** TGA curves of pure PS fibers, PDA particles and PS@PDA composite fibers.

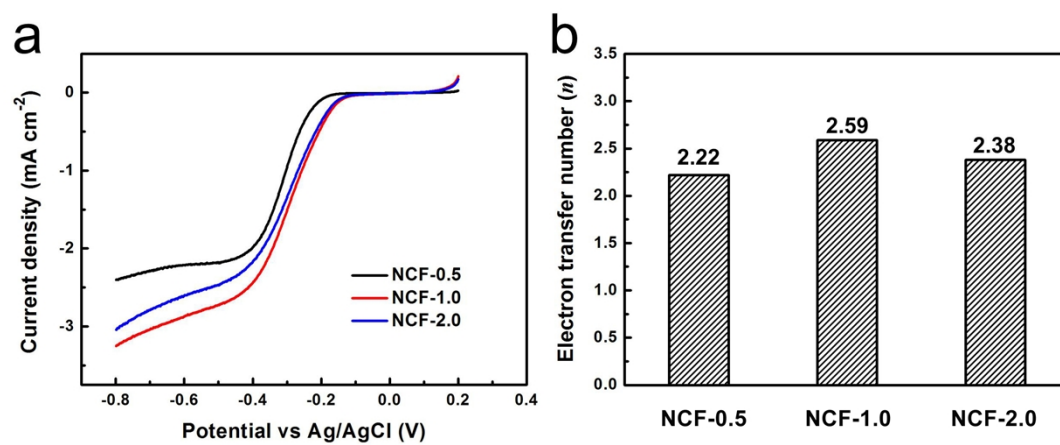

**Fig. S3** (a) LSV curves of different NCF fibers. Scan rate: 5 mV s<sup>-1</sup>, rotating rate: 1600 rpm; (b) Electron transfer numbers of the NCF fibers derived from their corresponding RDE data.

**Table S2.** Relative atomic ratio of N species obtained from the deconvoluted N 1s peaks.

| Sample      | Graphitic-N (%) | Pyridinic-N (%) | Pyrrolic-N (%) |
|-------------|-----------------|-----------------|----------------|
| NCF-Co-0.5M | 38.3            | 32.5            | 29.2           |

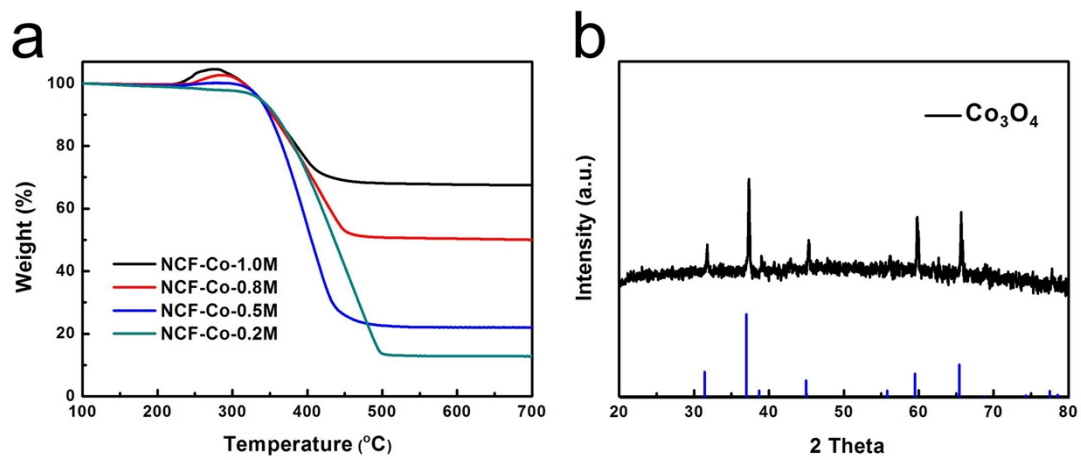

**Fig. S4** (a) TGA curves of NCF-Co composites and (b) XRD pattern of the TGA residue.
